# Supplementary material for: Combination assay of lung cancer associated serum markers using surface-enhanced Raman spectroscopy
Source: Royal Society of Chemistry journal article supplement (doi:10.1039/c5tb02780b), 2016-01-01
Supplement: c5tb02780b1.pdf [file c5tb02780b1.pdf]

## Supplementary Materials

### Combination assay of lung cancer associated serum markers by surface-enhanced Raman spectroscopy

Chunyuan Song, Yanjun Yang, Boyue Yang, Linghua Min and Lianhui Wang

**Table S1.** Comparison of the proposed work with some reported results (markers in buffer)

| Detection method         | Detection range                               | LOD                                                                                                          | Ref |
|--------------------------|-----------------------------------------------|--------------------------------------------------------------------------------------------------------------|-----|
| fluorescence             | AFP: 1.0 - 100 ng mL <sup>-1</sup>            | AFP: 0.72 ng mL <sup>-1</sup>                                                                                | [1] |
|                          | CEA: 1.0 - 120 ng mL <sup>-1</sup>            | CEA: 0.89 ng mL <sup>-1</sup>                                                                                |     |
|                          | 0.5 - 500 ng mL <sup>-1</sup>                 | CEA: 0.36 ng mL <sup>-1</sup><br>$\alpha$ -AFP: 0.28 ng mL <sup>-1</sup>                                     | [2] |
| field effect transistor  | 3 - 100 ng mL <sup>-1</sup>                   | CEA: 1 ng mL <sup>-1</sup><br>NSE: 1 ng mL <sup>-1</sup>                                                     | [3] |
|                          | 1 ng mL <sup>-1</sup> - 1 ug mL <sup>-1</sup> | CYFRA 21-1: 1 ng mL <sup>-1</sup><br>NSE: 10 ng mL <sup>-1</sup>                                             | [4] |
| electrochemiluminescence | 0.01 - 50 ng mL <sup>-1</sup>                 | CEA: 0.006 ng mL <sup>-1</sup><br>PSA: 0.003 ng mL <sup>-1</sup><br>$\alpha$ -AFP: 0.005 ng mL <sup>-1</sup> | [5] |
|                          | 0.01 - 0.1 pg mL <sup>-1</sup>                | CEA: 0.4 fg mL <sup>-1</sup><br>AFP: 0.4 fg mL <sup>-1</sup>                                                 | [6] |

|                  |                                                    |                                                                                              |                  |
|------------------|----------------------------------------------------|----------------------------------------------------------------------------------------------|------------------|
| electrochemistry | 0.02 pg mL <sup>-1</sup> - 5.0 ng mL <sup>-1</sup> | CEA: 0.093 pg mL <sup>-1</sup><br>AFP: 0.061 pg mL <sup>-1</sup>                             | [7]              |
|                  | 0.01 - 100 ng mL <sup>-1</sup>                     | CEA: 0.003 ng mL <sup>-1</sup><br>AFP: 0.002 ng mL <sup>-1</sup>                             | [8]              |
|                  | 0.01 - 100 ng mL <sup>-1</sup>                     | CEA: 2.7 pg mL <sup>-1</sup><br>PSA: 4.8 pg mL <sup>-1</sup><br>AFP: 3.1 pg mL <sup>-1</sup> | [9]              |
|                  | 0.01 - 100 ng mL <sup>-1</sup>                     | AFP: 10 pg mL <sup>-1</sup><br>CEA: 8.6 pg mL <sup>-1</sup><br>PSA: 7.5 pg mL <sup>-1</sup>  | [10]             |
| SERS             | 2 - 80 ng mL <sup>-1</sup>                         | CEA: 0.62 ng mL <sup>-1</sup><br>CK-19: 1.01 ng mL <sup>-1</sup>                             | [11]             |
|                  | 0 - 100 ng mL <sup>-1</sup>                        | CEA: 1.67 ng mL <sup>-1</sup><br>AFP: 1.56 ng mL <sup>-1</sup>                               | [12]             |
|                  | 1 fg mL <sup>-1</sup> - 1 ng mL <sup>-1</sup>      | CEA: 0.03 fg mL <sup>-1</sup><br>NSE: 0.66 fg mL <sup>-1</sup>                               | <b>This work</b> |

**Table S2.** Comparison of the proposed work with some reported results (markers in serum)

| Detection method         | Detection range                     | LOD                            | Ref  |
|--------------------------|-------------------------------------|--------------------------------|------|
| fluorescence             | CEA: 2 - 50 ng mL <sup>-1</sup>     | CEA: 0.02 ng mL <sup>-1</sup>  | [13] |
|                          | CA125: 0 - 400 U mL <sup>-1</sup>   | N/A                            |      |
| electrochemiluminescence | AFP: 0.5 - 100 ng mL <sup>-1</sup>  | AFP: 0.15 ng mL <sup>-1</sup>  | [14] |
|                          | CA125: 1.0 - 100 U mL <sup>-1</sup> | CA125: 0.6 U mL <sup>-1</sup>  |      |
|                          | CA199: 0.5 - 100 U mL <sup>-1</sup> | CA199: 0.17 U mL <sup>-1</sup> |      |

|      |                                                  |                                                                |                  |
|------|--------------------------------------------------|----------------------------------------------------------------|------------------|
|      | CEA: 1.0 - 100 ng mL <sup>-1</sup>               | CEA: 0.5 ng mL <sup>-1</sup>                                   |                  |
| LSPR | 1 fM - 1 nM                                      | AFP: 91 fM                                                     |                  |
|      |                                                  | CEA: 94 fM                                                     | [15]             |
|      |                                                  | PSA: 10 fM                                                     |                  |
| SERS | CA15-3: 0.1 - 500 U mL <sup>-1</sup>             | CA15-3: 0.99 U mL <sup>-1</sup>                                |                  |
|      | CA27-29: 0.1 - 500 U mL <sup>-1</sup>            | CA27-29: 0.13 U mL <sup>-1</sup>                               | [16]             |
|      | CEA: 0.1 - 500 ng mL <sup>-1</sup>               | CEA: 0.05 ng mL <sup>-1</sup>                                  |                  |
|      | 10 pg mL <sup>-1</sup> - 100 ng mL <sup>-1</sup> | CEA: 2.82 pg mL <sup>-1</sup><br>NSE: 2.04 pg mL <sup>-1</sup> | <b>This work</b> |

**Table S3.** Experiment design for studying the specificity of combined detection of CEA and NSE in BBS buffer

| Designations | CEA SERS tags | NSE SERS tags | immune-GMNPs | CEA | NES |
|--------------|---------------|---------------|--------------|-----|-----|
| blank        | √             | √             | √            |     |     |
| mismatch 1   | √             |               | √            |     | √   |
| mismatch 2   |               | √             | √            | √   |     |
| CEA          | √             | √             | √            | √   |     |
| NSE          | √             | √             | √            |     | √   |
| CEA/NSE      | √             | √             | √            | √   | √   |

**Table S4.** Experiment design for studying the specificity of combined detection of CEA and NSE in human serum

| Designations | CEA SERS tags | NSE SERS tags | immune-GMNPs | CEA | NES | AFP |
|--------------|---------------|---------------|--------------|-----|-----|-----|
| blank        | √             | √             | √            |     |     |     |
| AFP          | √             | √             | √            |     |     | √   |
| CEA          | √             | √             | √            | √   |     |     |
| NSE          | √             | √             | √            |     | √   |     |
| CEA/NSE      | √             | √             | √            | √   | √   |     |

**Table S5.** Characterization of LSPR peaks of the Au NFs after each surface modification for preparing CEA SERS tags

| Materials             | $\lambda$ (nm) | $\Delta\lambda$ (nm) |
|-----------------------|----------------|----------------------|
| Au NFs                | 803            |                      |
| Au NFs-4MBA           | 813            | 10                   |
| Au NFs-4MBA (EDC/NHS) | 814.5          | 1.5                  |
| Au NFs-4MBA-anti CEA  | 842            | 27.5                 |

**Table S6.** Characterization of LSPR peaks of the Au NFs after each surface modification for preparing NSE SERS tags

| Materials             | $\lambda$ (nm) | $\Delta\lambda$ (nm) |
|-----------------------|----------------|----------------------|
| Au NFs                | 803            |                      |
| Au NFs-DTNB           | 819            | 16                   |
| Au NFs-DTNB (EDC/NHS) | 821            | 2                    |
| Au NFs-DTNB-anti NSE  | 845            | 24                   |

**Table S7.** Zeta potential of the Au NFs after each surface modification for preparing CEA SERS tags

| Materials             | Zeta potential (mV) |
|-----------------------|---------------------|
| Au NFs                | $46.32 \pm 1.02$    |
| Au NFs-4MBA           | $-21.65 \pm 1.64$   |
| Au NFs-4MBA (EDC/NHS) | $-34.12 \pm 0.71$   |
| Au NFs-4MBA-anti CEA  | $-45.49 \pm 1.32$   |

**Table S8.** Zeta potential of the Au NFs after each surface modification for preparing NSE SERS tags

| Materials             | Zeta potential (mV) |
|-----------------------|---------------------|
| Au NFs                | $46.32 \pm 1.02$    |
| Au NFs-DTNB           | $-28.64 \pm 2.24$   |
| Au NFs-DTNB (EDC/NHS) | $-36.81 \pm 1.34$   |
| Au NFs-DTNB-anti NSE  | $-50.73 \pm 1.38$   |

**Table S9.** Characterization of LSPR peaks of the GMNPs before and after immobilization of mixed antibodies

| Materials              | $\lambda$ (nm) | $\Delta\lambda$ (nm) |
|------------------------|----------------|----------------------|
| GMNP                   | 608            |                      |
| GMNP-anti CEA/anti NSE | 616            | 8                    |

**Table S10.** Zeta potential of the GMNPs before and after immobilization of mixed antibodies

| Materials              | Zeta potential (mV) |
|------------------------|---------------------|
| GMNP                   | $-30.70 \pm 1.89$   |
| GMNP-anti CEA/anti NSE | $-40.47 \pm 1.21$   |

## References

1. Li, J.; Wang, H.; Dong, S.; Zhu, P.; Diao, G.; Yang, Z., Quantum-dot-tagged photonic crystal beads for multiplex detection of tumor markers. *Chemical Communications* **2014**, *50*, 14589-14592.
2. Tian, J.; Zhou, L.; Zhao, Y.; Wang, Y.; Peng, Y.; Zhao, S., Multiplexed detection of tumor markers with multicolor quantum dots based on fluorescence polarization immunoassay. *Talanta* **2012**, *92*, 72-77.
3. Li, H.; Cao, Z.; Zhang, Y.; Lau, C.; Lu, J., Simultaneous detection of two lung cancer biomarkers using dual-color fluorescence quantum dots. *Analyst* **2011**, *136*, 1399-1405.
4. Cheng, S.; Hideshima, S.; Kuroiwa, S.; Nakanishi, T.; Osaka, T., Label-free detection of tumor markers using field effect transistor (FET)-based biosensors for lung cancer diagnosis. *Sensors and Actuators B: Chemical* **2015**, *212*, 329-334.
5. Zhang, Y.; Liu, W.; Ge, S.; Yan, M.; Wang, S.; Yu, J.; Li, N.; Song, X., Multiplexed sandwich immunoassays using flow-injection electrochemiluminescence with designed substrate spatial-resolved technique for detection of tumor markers. *Biosensors and Bioelectronics* **2013**, *41*, 684-690.

6. Guo, Z.; Hao, T.; Du, S.; Chen, B.; Wang, Z.; Li, X.; Wang, S., Multiplex electrochemiluminescence immunoassay of two tumor markers using multicolor quantum dots as labels and graphene as conducting bridge. *Biosensors and Bioelectronics* **2013**, *44*, 101-107.
7. Lai, G.; Wu, J.; Ju, H.; Yan, F., Streptavidin-Functionalized Silver-Nanoparticle-Enriched Carbon Nanotube Tag for Ultrasensitive Multiplexed Detection of Tumor Markers. *Advanced Functional Materials* **2011**, *21*, 2938-2943.
8. Liu, N.; Liu, Z.; Han, H.; Ma, Z., Graphene oxide reduced directly by redox probes for multiplexed detection of tumor markers. *Journal of Materials Chemistry B* **2014**, *2*, 3292-3298.
9. Xu, T.; Liu, N.; Yuan, J.; Ma, Z., Triple tumor markers assay based on carbon-gold nanocomposite. *Biosensors & Bioelectronics* **2015**, *70*, 161-166.
10. Wang, Z.; Liu, N.; Feng, F.; Ma, Z., Synthesis of cadmium, lead and copper alginate nanobeads as immunosensing probes for the detection of AFP, CEA and PSA. *Biosensors and Bioelectronics* **2015**, *70*, 98-105.
11. Lu, W.; Wang, Y.; Cao, X.; Li, L.; Dong, J.; Qian, W., Multiplexing determination of lung cancer biomarkers using electrochemical and surface-enhanced Raman spectroscopic techniques. *New Journal of Chemistry* **2015**, *39*, 5420-5430.
12. Chon, H.; Lee, S.; Yoon, S.Y.; Chang, S.-I.; Lim, D. W.; Choo, J., Simultaneous immunoassay for the detection of two lung cancer markers using functionalized SERS nanoprobe. *Chemical communications* **2011**, *47*, 12515-12517.
13. Jokerst, J. V.; Raamanathan, A.; Christodoulides, N.; Floriano, P. N.; Pollard, A. A.; Simmons, G. W.; Wong, J.; Gage, C.; Furgala, W. B.; Redding, S. W., Nano-bio-chips for high performance multiplexed protein detection: determinations of cancer biomarkers in serum and saliva using quantum dot bioconjugate labels. *Biosensors and Bioelectronics* **2009**, *24*, 3622-3629.
14. Ge, L.; Yan, J.; Song, X.; Yan, M.; Ge, S.; Yu, J., Three-dimensional paper-based electrochemiluminescence immunodevice for multiplexed measurement of biomarkers and point-of-care testing. *Biomaterials* **2012**, *33*, 1024-1031.
15. Lee, J. U.; Nguyen, A. H.; Sim, S. J., A nanoplasmonic biosensor for label-free multiplex detection of cancer biomarkers. *Biosensors and Bioelectronics* **2015**, *74*, 341-346.
16. Li, M.; Kang, J. W.; Sukumar, S.; Dasari, R. R.; Barman, I., Multiplexed detection of serological cancer markers with plasmon-enhanced Raman spectro-immunoassay. *Chemical Science* **2015**, *6*, 3906-3914.
